# Supplementary material for: Deep sequencing of multiple regions of glial tumors reveals spatial heterogeneity for mutations in clinically relevant genes
Source: PubMed Central journal article supplement (PMC4272528; doi:10.1186/s13059-014-0530-z), 2014-12-03
Supplement: 13059_2014_530_MOESM1_ESM.pdf [file 13059_2014_530_MOESM1_ESM.pdf]

## Supplementary Material

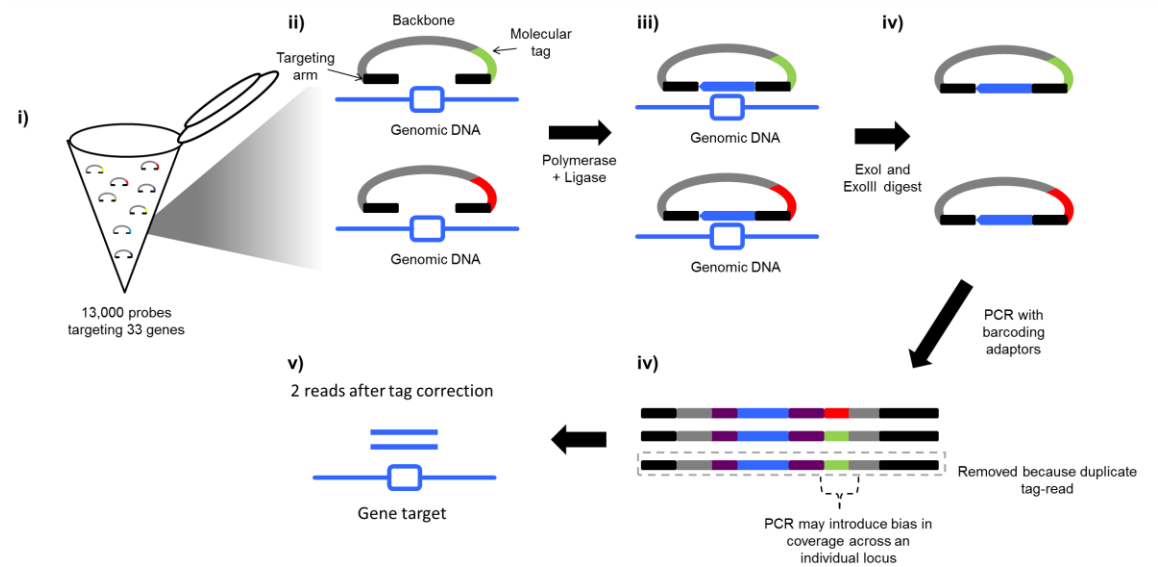

**Supp. Figure 1: Overview of Molecular Inversion Probe Strategy (detailed).** i) genomic DNA from each region is added to a tube containing a mixture of probes targeting the exons of 33 genes. For clarity, we focus on one targeted region here. ii) A single molecule Molecular Inversion Probe (smMIP) consists of two regions complementary to a target of interest, a common backbone sequence and a 12bp molecular tag (used in error-correction). iii) After a polymerase gap-fill and ligation, each target sequence is captured to create a circular molecule of DNA. iv) Exonuclease (ExoI + ExoIII) digest removes remaining genomic DNA template and single stranded smMIP probes. v) After inverse PCR (with barcoding adaptors) against the common backbone, some targets are nonuniformly amplified. These instances are removed after molecular tag-correction. Barcode sequences (not shown) allow capture products from multiple individual tumors or regions to be pooled on a single sequencing lane.

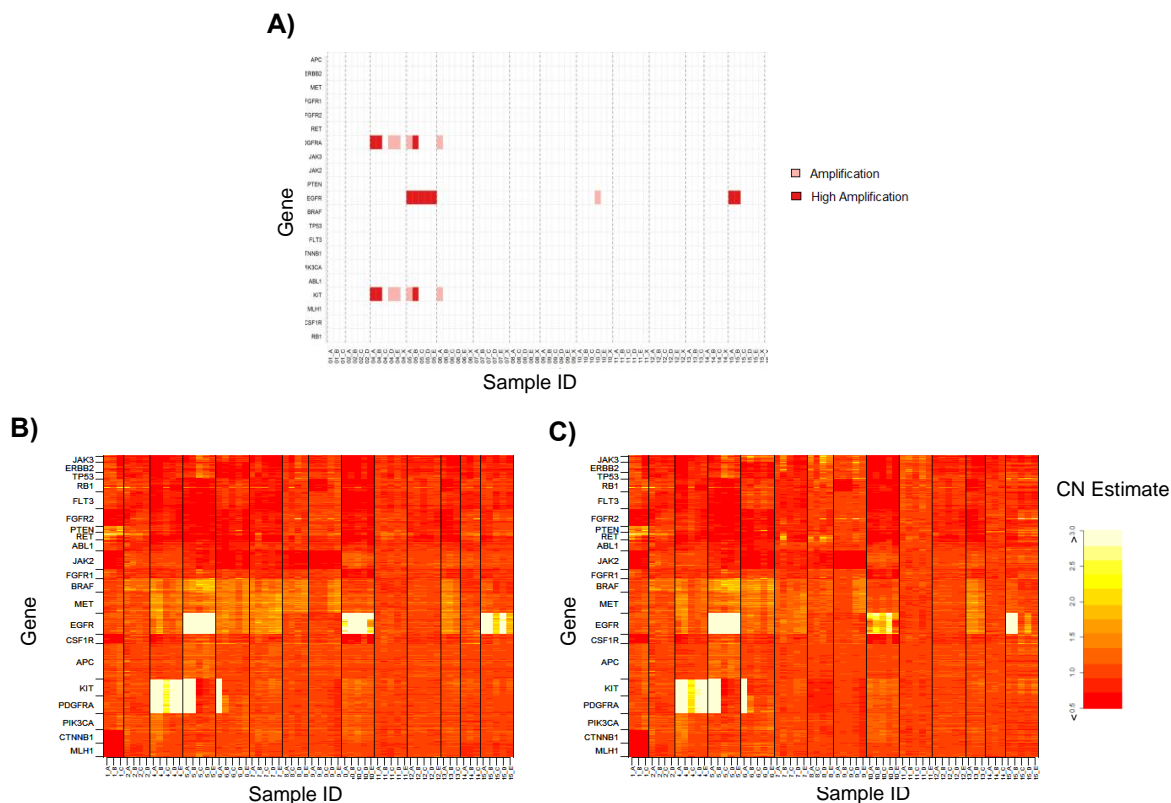

**Supp. Figure 2:** a) Copy number calls from MIP captures using matched control tissue for samples BI04, BI06, BI07, BI08, BI09, BI10, BI11, BI12, BI14 and BI15, and a universal control (BI12) for samples BI01, BI02, BI05 and BI13 (as for the latter, matched control tissue was not available). Amplification indicates genes with coverage three-fold higher than median coverage across a sample. High Amplification indicates genes with coverage six-fold higher than median coverage across a sample. Notably, this analysis does not detect EGFR amplification in regions A, B and C of BI10 and region D of tumor BI15, events that were detected with the use of the universal control (BI12; see **Figure 2** of main text). These EGFR amplifications were also detected using Taqman qPCR (**Supp. Figure 3**). Careful review indicates the reason for discrepancy is likely due to increased tumor contamination within the respective matched control tissues (region “X” in tumors **BI04**, **BI07**, **BI08** and **BI10** in **Supp. Table 3**). In those cases, the control tissue exhibited a high allele fraction of mutation in known cancer genes. For this reason, we chose to rely on the results of analysis where all tumors were matched with BI12 as a universal control. Panels **b**) and **c**) show the raw data used to call copy number using universal and matched controls, respectively. Tumor regions are shown on the x-axis with vertical lines separating regions from different tumors. Probes (grouped by gene) are shown on the y-axis. The color represents the read depth at each probe normalized against the median read depth across all other probes from the same tumor sample. Use of a “universal control” enables better detection of high-level EGFR amplifications in multiple regions of both tumor BI10 and BI15. We used high thresholds to call a gene as amplified (CN estimate  $> 3$ ). Blocks of higher signal may correspond to aneuploidy; however thresholds were not set for this sensitivity.

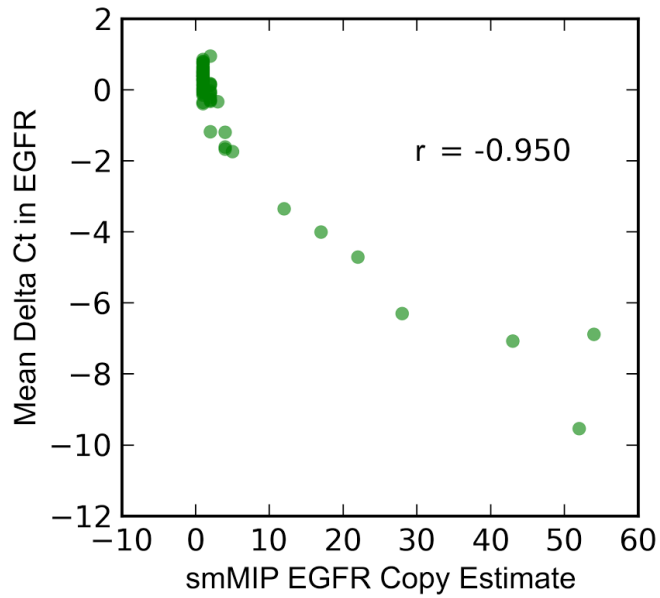

**Supp. Figure 3: Validation of EGFR gene estimates** Correlation with of copy number estimates from smMIP vs. Taqman for EGFR. Taqman experiments were performed in duplicate for EGFR across all 62 regions investigated in this study. smMIP and Taqman copy number estimate were highly correlated with an  $R^2$  of .90. Importantly, all high-level amplifications of EGFR (delta Ct  $\leq$  -2) were identified by the smMIP assay.

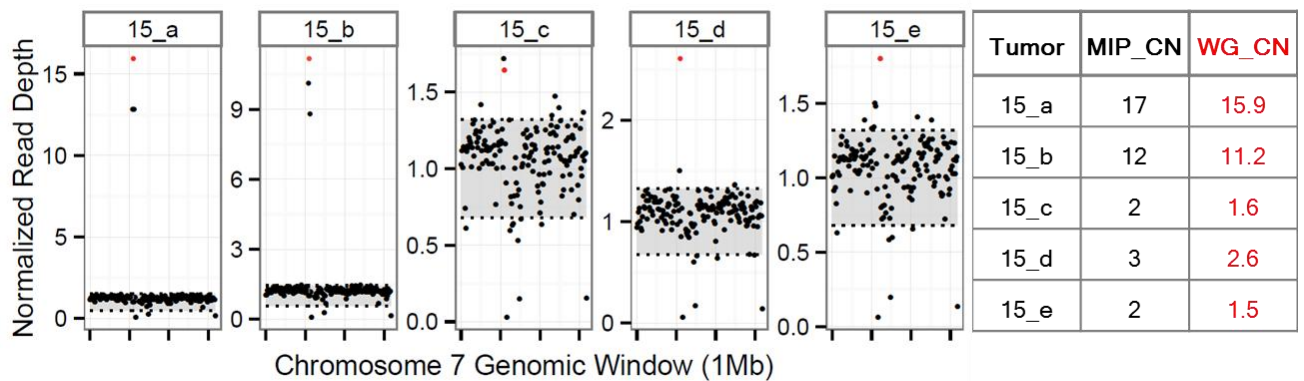

**Supp. Figure 4:** Validation of EGFR copy number by low-pass whole genome sequencing. DNA isolated from regions A-E in BI15 were subjected to light genome sequencing on the Illumina Miseq. Read depth within 1 Mb intervals across Chromosome 7 is normalized with respect to mean read depth across all chromosomes within each sample (see **Supplementary Methods**). Normalized read depth from whole genome sequencing within the 1 Mb region containing *EGFR* is highlighted in red within CN plots. Copy number of *EGFR* (WG\_CN in table) from low-pass whole genome sequencing was compared with those estimates obtained using the MIP assay (MIP\_CN). Regions A and B contain high-level amplification in the region containing EGFR while a similar amplification is not seen within regions C, D and E.

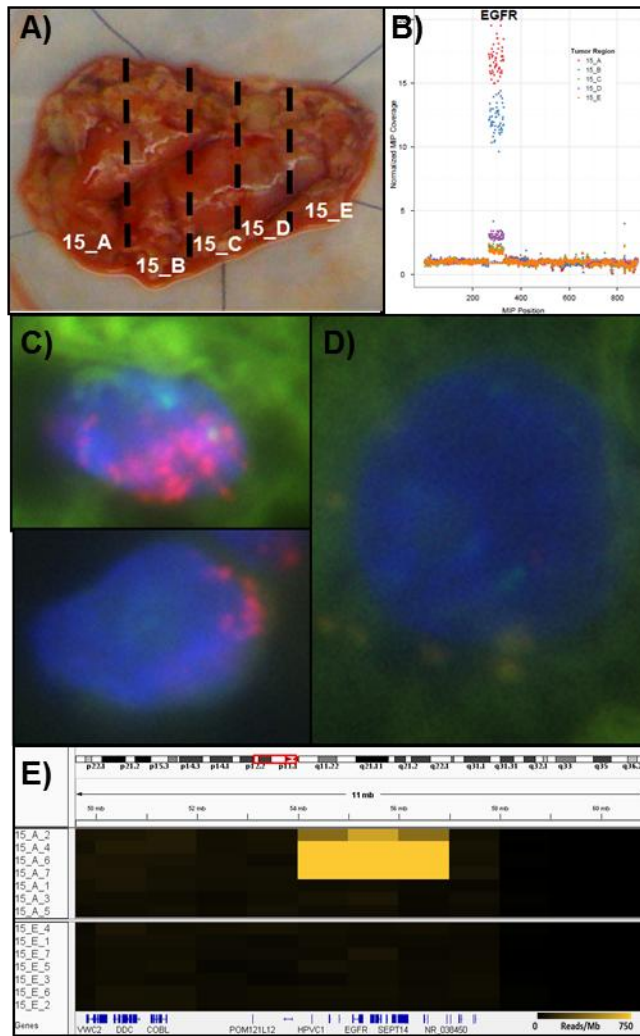

**Supp. Figure 5: Measured *EGFR* amplification heterogeneity a result of varying levels of stromal contamination in BI15.** a) GBM tumor used in dissection. b) Copy number estimates based on smMIP probe data. *EGFR* amplification (labeled) was called in regions A and B with only mild amplification detected in region C, D and E. Histologic examination and whole genome sequencing (Supp. Figure 6) suggested a marked decrease in tumor cellularity in regions C, D and E which likely accounted for the difference in copy number. c) and d) show representative FISH detection of *EGFR* amplification in region A (left images) and its absence in region E, respectively. Unprocessed images were obtained using a dual pass filter for spectrum orange and spectrum green and spectrum blue (DAPI). e) Validation of *EGFR* amplification in region A using single cell sequencing. Single cells from regions A and E were flow sorted, amplified and sequenced on the Illumina Miseq, resulting in 100,000 reads per sample. Copy number profiles were created by plotting read depth across the genome in 1 Mb intervals, with color of each genomic region corresponding to the number of mapping reads per interval. Four of seven cells from region A (15\_A\_2, 15\_A\_4, 15\_A\_6 and 15\_A\_7) have high level *EGFR* amplification while zero of seven cells in region E have similar amplification.

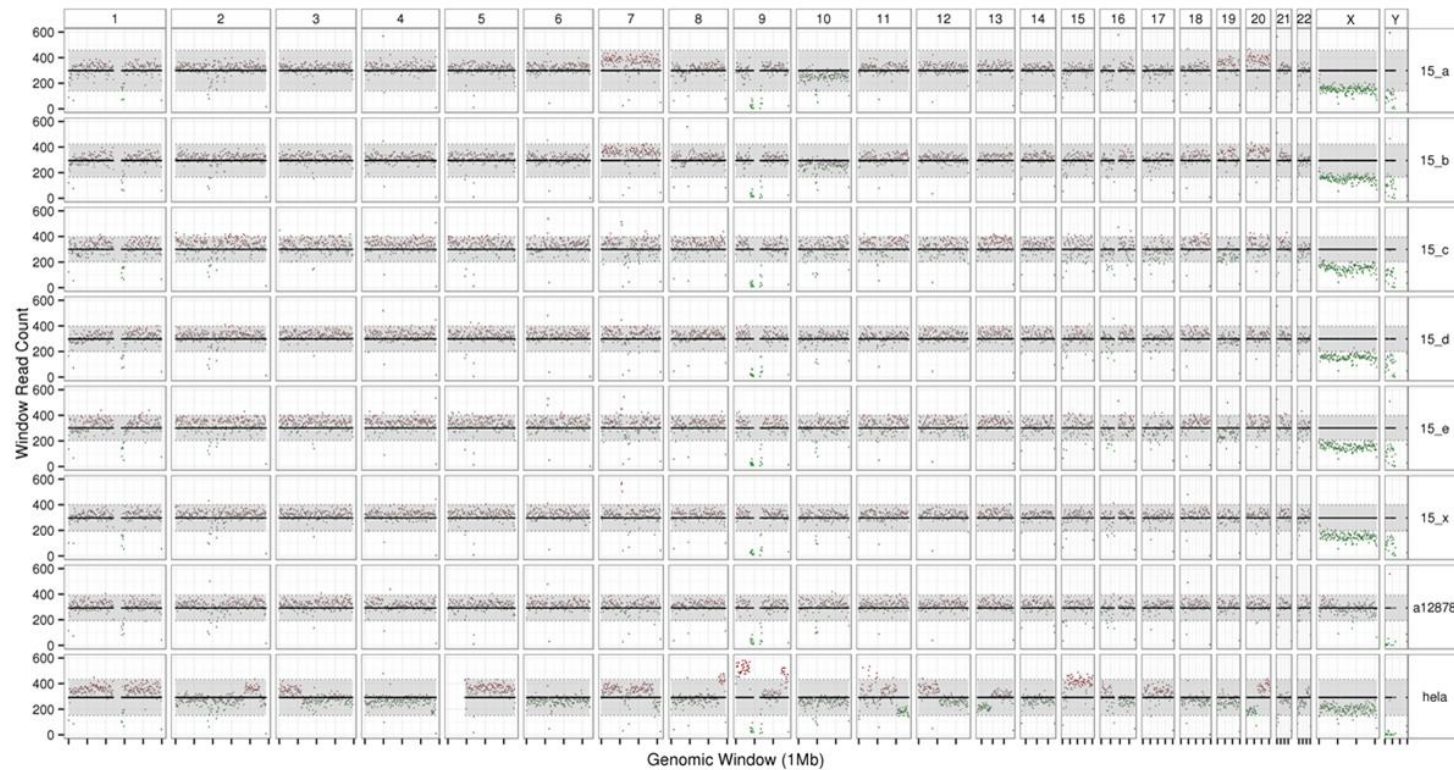

**Supp Figure 6: Whole genome copy number profiles of regions A-E in BI15.** To identify other possible copy number alterations that may be shared across all tumor sections, DNA isolated from regions A-E from BI15 (shown as 15\_a - 15\_e), the corresponding control region X (15\_x) and two unrelated cell lines (NA12878 and HeLa) were subjected to light genome sequencing on the Illumina Miseq. 500,000 reads per sample were aligned to the hg19 reference and copy number is shown across the genome in 1 Mb intervals. Regions A and B of BI15 share gain in chromosome 7 loss of chromosome 10. However, no gross chromosomal aberration was shared across all tumor regions. Black line corresponds to the mean coverage across all 1 Mb windows in autosomes. Shaded regions correspond to the region 1 S.D. below and above mean coverage for each sample. Two cell lines (12878 and HeLa) derived from female individuals are shown for comparison. Chromosome X appears as lost in all regions from tumor BI15 (including control) of the tumor as it was derived from a male patient.

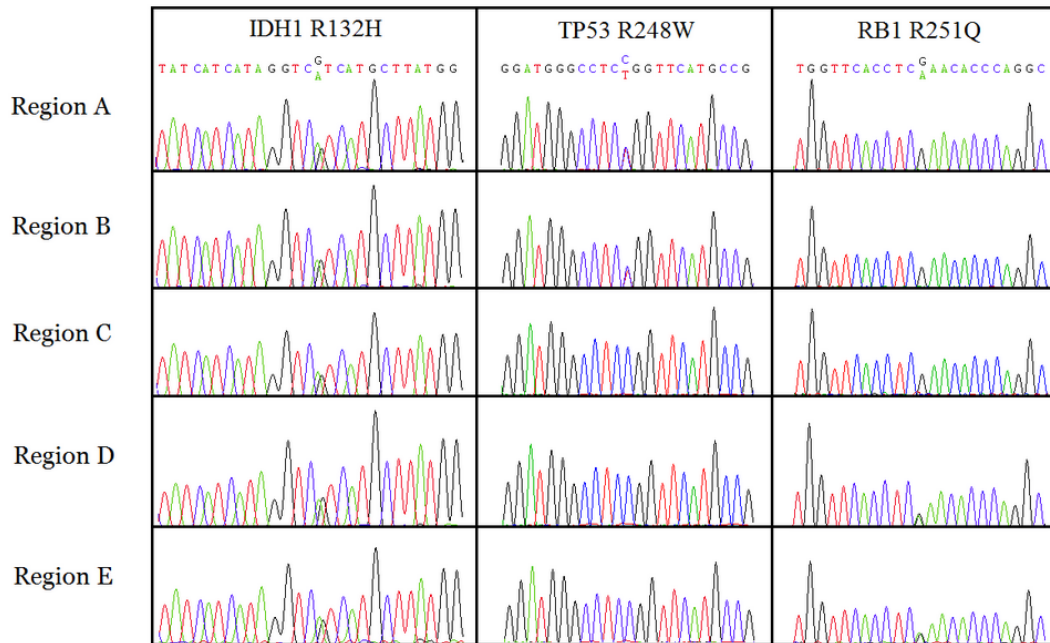

**Supp. Figure 7: Sanger validation of *TP53* and *RB1* heterogeneity in tumor BI09.** We performed Sanger sequencing across three different loci from 5 regions of tumor BI09. All five regions (A-E) share mutations in *IDH1*. Tumor regions A and B have detectable mutations in *TP53*, while regions D and E have detectable mutations in *RB1*.

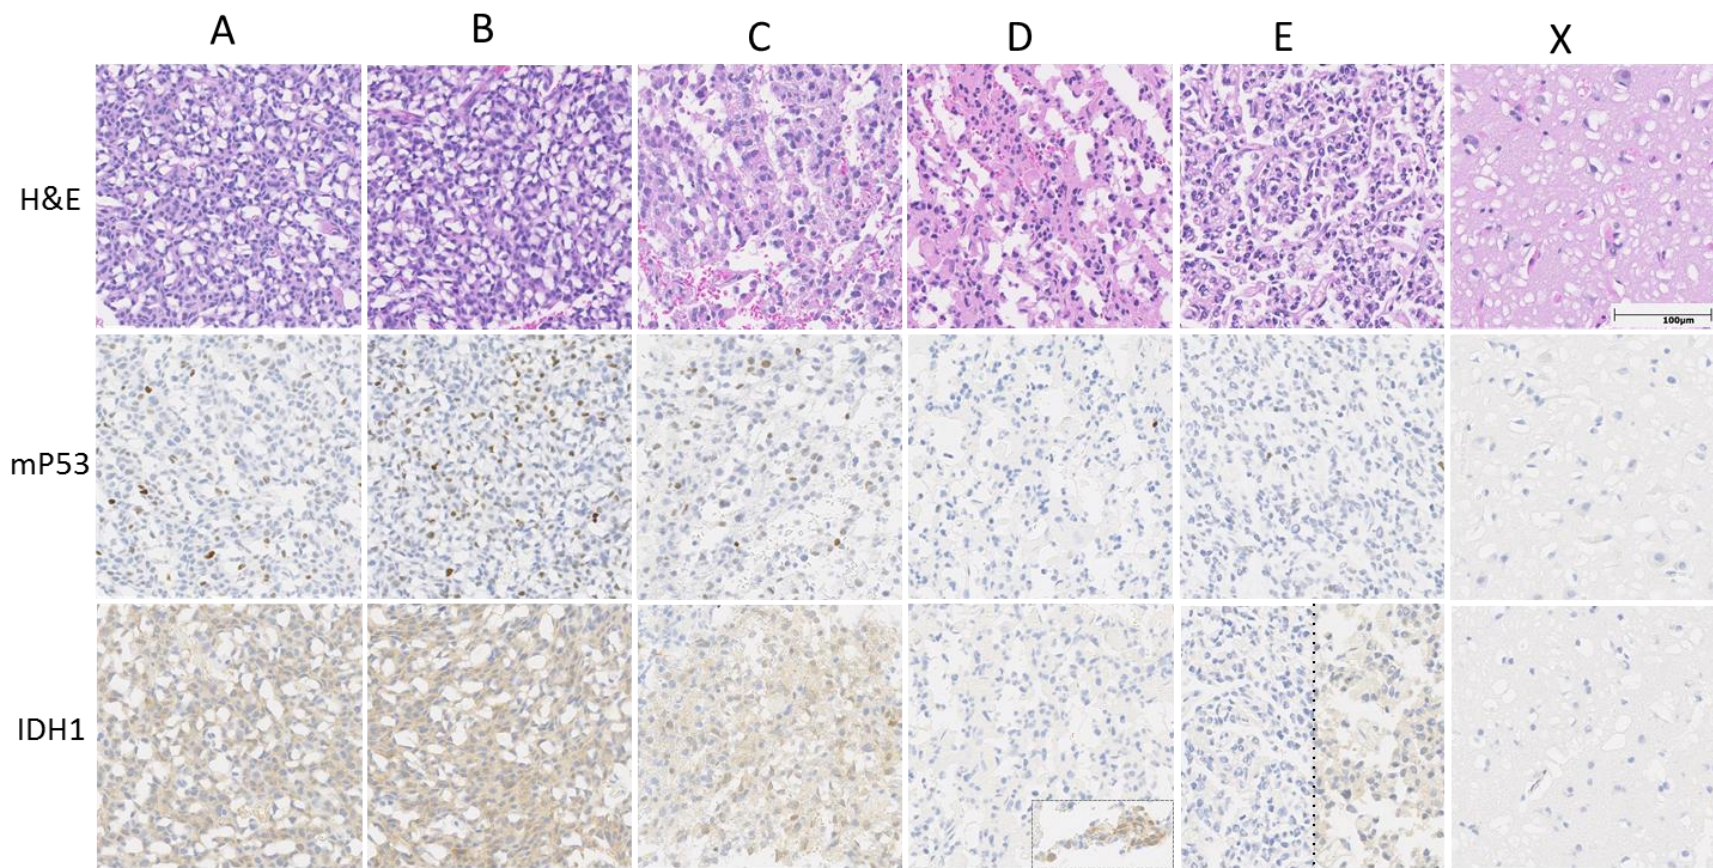

**Supp. Figure 8: H&E and immunohistochemical (IHC) staining of p53 and IDH1 in tumor BI09.** IHC staining of p53 and IDH1 is shown across tumor regions A-E and corresponding control region X from tumor BI09. The pattern of staining differs across each of the five regions (A-E) and is consistent with the intratumoral heterogeneity identified with by sequencing. Partitioning of IDH1 photographs D and E illustrates that IDH1 heterogeneity was also present within these sections.



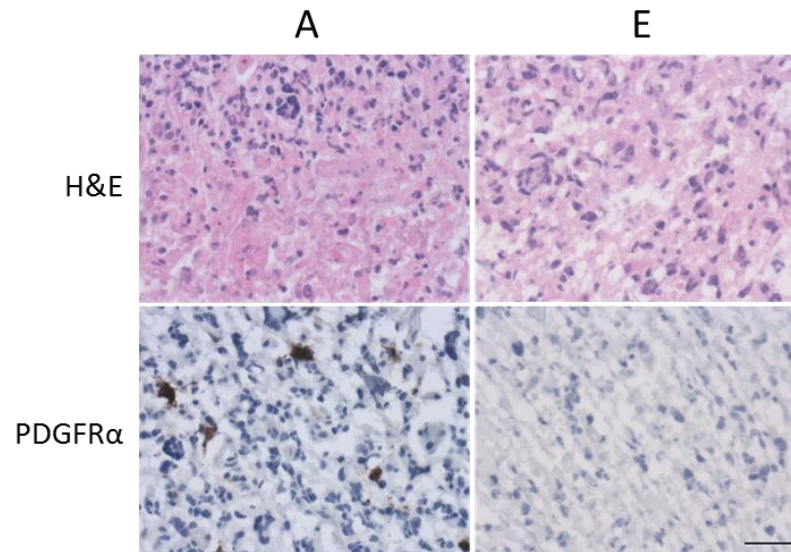

**Supp. Figure 9: H&E and PDGFR $\alpha$  IHC staining of regions A and E in tumor BI05.** IHC of regions A and E reveals differential staining of PDGFR $\alpha$ , with staining prominent in region A and not in region E. This is consistent with genomic findings: with amplification of the PDGFRA gene observed in regions A and B but not C, D or E. Original magnification 40x. Scale bar indicates 30 microns. EGFR IHC revealed robust expression across all regions (not shown).

| Sample Name | Tumor Type* | Grade* | Age at Surgery | IDH1 status | p53 status | 1p19q status | Control tissue | # Samples (Mutation) | # samples (CN) |
|-------------|-------------|--------|----------------|-------------|------------|--------------|----------------|----------------------|----------------|
| BI_01       | Ependymoma  | III    | 33             | mutant      | NA         | NA           | N              | 3: A,B,C             | 3: A,B,C       |
| BI_02       | GBM         | IV     | 29             | mutant      | mutant     | NA           | N              | 4: A,B,C,D           | 4: A,B,C,D     |
| BI_04       | GBM         | IV     | 67             | wt          | NA         | NA           | Y              | 5: A,B,C,D,E         | 5: A,B,C,D,E   |
| BI_05       | GBM         | IV     | 60             | wt          | NA         | NA           | N              | 5: A,B,C,D,E         | 5: A,B,C,D,E   |
| BI_06       | GBM         | IV     | 63             | mutant      | NA         | NA           | Y              | 5: A,B,C,D,E         | 5: A,B,C,D,E   |
| BI_07       | GBM         | IV     | 62             | mutant      | NA         | NA           | Y              | 5: A,B,C,D,E         | 5: A,B,C,D,E   |
| BI_08       | Astrocytoma | III    | 35             | mutant      | mutant     | Not-del      | Y              | 4: A,C,D,E           | 4: A,C,D,E     |
| BI_09       | AO          | III    | 72             | mutant      | mutant     | Co-del       | Y              | 5: A,B,C,D,E         | 5: A,B,C,D,E   |
| BI_10       | GBM         | IV     | 73             | wt          | NA         | NA           | Y              | 5: A,B,C,D,E         | 5: A,B,C,D,E   |
| BI_11       | GBM         | IV     | 41             | wt          | NA         | NA           | Y              | 5: A,B,C,D,E         | 5: A,B,C,D,E   |
| BI_12       | GBM         | IV     | 63             | wt          | NA         | NA           | Y              | 5: A,B,C,D,E         | 5: A,B,C,D,E   |
| BI_13       | GBM         | IV     | 68             | wt          | NA         | NA           | N              | 3: A,B,C             | 3: A,B,C       |
| BI_14       | Astrocytoma | II     | 19             | mutant      | NA         | NA           | Y              | 3: A,B,C             | 3: A,B,C       |
| BI_15       | GBM         | IV     | 57             | wt          | NA         | NA           | Y              | 5: A,B,C,D,E         | 5: A,B,C,D,E   |

**Supp. Table 1: Tumors investigated in this study.** Our sample set includes a total of 62 spatial sections from 14 glial tumors. All tumors were grade III or higher, with one exception. Clinical information regarding IDH1, p53 and 1p19q mutation as determined by pathology is shown. For a total of 10 tumors matched “Control tissue” was available in the form of adjacent brain tissue that appeared to be grossly uninvolved with tumor. IDH1 status was measured by IHC against IDH-R132H mutant. GBM, Glioblastoma Multiforme; wt, wild-type; CN, copy number; AO: Anaplastic Oligodendroglioma; NA: Not Available;  
 \*Diagnosis based on neuropathology report, which is based on the highest degree tumor available at the time

| Gene   | # of Targeted Coding Bases | Median % bases >30x coverage |
|--------|----------------------------|------------------------------|
| ABL1   | 3613                       | 96.5%                        |
| AKT1   | 1501                       | 84.5%                        |
| AKT2   | 1561                       | 96.7%                        |
| APC    | 8828                       | 96.4%                        |
| BRAF   | 2389                       | 92.3%                        |
| CDK4   | 947                        | 98.3%                        |
| CDKN2A | 1293                       | 73.9%                        |
| CSF1R  | 3082                       | 98.0%                        |
| CTNNB1 | 2386                       | 97.6%                        |
| EGFR   | 4288                       | 97.8%                        |
| ERBB2  | 3832                       | 89.0%                        |
| FGFR1  | 2776                       | 98.1%                        |
| FGFR2  | 2915                       | 98.0%                        |
| FGFR3  | 2679                       | 87.9%                        |
| FLT3   | 3075                       | 95.5%                        |
| HRAS   | 722                        | 97.2%                        |
| JAK2   | 3511                       | 97.8%                        |
| JAK3   | 3421                       | 92.9%                        |
| KIT    | 3042                       | 98.3%                        |
| KRAS   | 739                        | 99.1%                        |
| MET    | 4285                       | 98.9%                        |
| MLH1   | 1963                       | 97.9%                        |
| MYC    | 1403                       | 97.6%                        |
| NRAS   | 595                        | 98.8%                        |
| PDGFRA | 3356                       | 98.8%                        |
| PIK3CA | 3267                       | 96.5%                        |
| PTEN   | 1257                       | 88.8%                        |
| RB1    | 2838                       | 94.5%                        |
| RET    | 3599                       | 95.4%                        |
| SRC    | 1666                       | 91.7%                        |
| STK11  | 1377                       | 89.9%                        |
| TP53   | 1448                       | 94.6%                        |
| VHL    | 510                        | 94.9%                        |

**Supp. Table 2: Genes Targeted by single molecule Molecular Inversion Probe (smMIP) assay with capture efficiency.** Our probes target the coding sequence of 33 cancer related genes. The number of coding bases targeted and capture efficiency is shown across these genes here. Median % bases >30x coverage represents the median percent of targeted coding bases that have greater than 30x coverage across all samples captured. Positions were required to have greater than 30x coverage in order to be considered for mutation calling.

| Tumor | Chr | Position  | Gene          | Mutation type | Allele Balance within each region |        |        |        |        |        | Coverage (tag-corrected) |      |      |      |      |      |
|-------|-----|-----------|---------------|---------------|-----------------------------------|--------|--------|--------|--------|--------|--------------------------|------|------|------|------|------|
|       |     |           |               |               | X                                 | A      | B      | C      | D      | E      | X                        | A    | B    | C    | D    | E    |
| BI01  | 4   | 55593464  | <i>KIT</i>    | missense      | NA                                | 0.5093 | 0.5064 | 0.5039 | NA     | NA     | NA                       | 699  | 1637 | 772  | NA   | NA   |
| BI01  | 17  | 7577121   | <i>TP53</i>   | missense      | NA                                | 0.9442 | 0.9688 | 0.9606 | NA     | NA     | NA                       | 1325 | 2661 | 635  | NA   | NA   |
| BI02  | 4   | 55593464  | <i>KIT</i>    | missense      | NA                                | 0.5181 | 0.5226 | 0.5074 | 0.544  | NA     | NA                       | 1355 | 597  | 808  | 897  | NA   |
| BI02  | 17  | 7577124   | <i>TP53</i>   | missense      | NA                                | 0.8952 | 0.8488 | 0.8918 | 0.9006 | NA     | NA                       | 1680 | 820  | 915  | 1147 | NA   |
| BI04  | 17  | 7577535   | <i>TP53</i>   | missense      | 0.1792                            | 0.7706 | 0.642  | 0.2302 | 0.5122 | 0.7401 | 1557                     | 1308 | 1014 | 1690 | 1478 | 1443 |
| BI05  | 13  | 28626716  | <i>FLT3</i>   | missense      | NA                                | 0.709  | 0.7306 | 0.9126 | 0.9792 | 0.8601 | NA                       | 409  | 657  | 206  | 192  | 243  |
| BI05  | 17  | 37866342  | <i>ERBB2</i>  | missense      | NA                                | 0.1538 | 0.0805 | 0.0345 | 0      | 0.1481 | NA                       | 65   | 87   | 58   | 33   | 54   |
| BI06  | 10  | 89711874  | <i>PTEN</i>   | splice        | 0                                 | 0.5143 | 0.7172 | 0.5348 | 0.3033 | 0.6885 | 125                      | 175  | 396  | 230  | 244  | 183  |
| BI07  | 10  | 89624273  | <i>PTEN</i>   | missense      | 0.1956                            | 0.5303 | 0.3749 | 0.5211 | 0.4    | 0.6341 | 675                      | 413  | 939  | 545  | 215  | 246  |
| BI08  | 17  | 7577120   | <i>TP53</i>   | missense      | 0.4149                            | 0.7721 | NA     | 0.6099 | 0.73   | 0.814  | 1157                     | 1009 | NA   | 1033 | 3834 | 645  |
| BI08  | 17  | 7578204   | <i>TP53</i>   | missense      | 0.0009                            | 0      | NA     | 0      | 0.1362 | 0.0747 | 1090                     | 787  | NA   | 867  | 3341 | 629  |
| BI09  | 13  | 48936984  | <i>RBI</i>    | missense      | 0                                 | 0      | 0      | 0      | 0.4451 | 0.4333 | 763                      | 369  | 363  | 387  | 1813 | 630  |
| BI09  | 17  | 7577538   | <i>TP53</i>   | missense      | 0.0069                            | 0.4975 | 0.4342 | 0.0045 | 0.0005 | 0.0007 | 1732                     | 1598 | 1428 | 1539 | 4208 | 1507 |
| BI10  | 17  | 7577022   | <i>TP53</i>   | stop-gained   | 0.0611                            | 0.8765 | 0.8404 | 0.6253 | 0.645  | 0.9228 | 1440                     | 502  | 1247 | 1073 | 1690 | 557  |
| BI12  | 3   | 41266113  | <i>CTNNA1</i> | missense      | 0                                 | 0.3684 | 0.3737 | 0.4512 | 0.4455 | 0.3493 | 568                      | 1056 | 1132 | 1106 | 918  | 355  |
| BI12  | 3   | 178921435 | <i>PIK3CA</i> | missense      | 0                                 | 0.2032 | 0.142  | 0.2953 | 0.1928 | 0.2808 | 721                      | 1629 | 1676 | 1497 | 1385 | 616  |
| BI12  | 5   | 112102891 | <i>APC</i>    | missense      | 0                                 | 0.3954 | 0.3882 | 0.4678 | 0.4406 | 0.3416 | 448                      | 951  | 930  | 902  | 799  | 363  |
| BI12  | 5   | 112177421 | <i>APC</i>    | missense      | 0.0023                            | 0.374  | 0.3708 | 0.4224 | 0.4614 | 0.3527 | 1318                     | 3032 | 2964 | 2919 | 2484 | 1069 |
| BI12  | 7   | 116340036 | <i>MET</i>    | missense      | 0                                 | 0.0726 | 0.0212 | 0.0637 | 0.1243 | 0.0226 | 629                      | 1294 | 1322 | 1302 | 1038 | 443  |
| BI12  | 9   | 5055669   | <i>JAK2</i>   | missense      | 0                                 | 0.3764 | 0.3005 | 0.3973 | 0.4524 | 0.366  | 858                      | 2115 | 2020 | 1787 | 1786 | 817  |
| BI12  | 10  | 89685290  | <i>PTEN</i>   | missense      | 0                                 | 0.0009 | 0.106  | 0.0363 | 0.001  | 0      | 1401                     | 2124 | 2255 | 2206 | 1917 | 886  |
| BI12  | 10  | 89692790  | <i>PTEN</i>   | missense      | 0                                 | 0.5278 | 0.4972 | 0.6395 | 0.5754 | 0.5084 | 668                      | 1061 | 1090 | 1057 | 862  | 419  |
| BI12  | 10  | 89711910  | <i>PTEN</i>   | stop-gained   | 0                                 | 0      | 0      | 0.0056 | 0.1242 | 0      | 320                      | 446  | 755  | 536  | 451  | 182  |
| BI12  | 12  | 25380240  | <i>KRAS</i>   | missense      | 0.0011                            | 0      | 0.0026 | 0.0062 | 0.0974 | 0.0013 | 887                      | 2119 | 1919 | 1940 | 1684 | 766  |
| BI12  | 13  | 28588626  | <i>FLT3</i>   | missense      | 0.0028                            | 0.3483 | 0.3383 | 0.6072 | 0.4048 | 0.2731 | 358                      | 669  | 677  | 499  | 583  | 260  |
| BI12  | 13  | 28610078  | <i>FLT3</i>   | missense      | 0                                 | 0.3484 | 0.3467 | 0.5534 | 0.4138 | 0.3245 | 327                      | 620  | 672  | 506  | 580  | 265  |
| BI12  | 13  | 28636062  | <i>FLT3</i>   | missense      | 0                                 | 0.4107 | 0.4206 | 0.6316 | 0.5    | 0.3111 | 63                       | 112  | 126  | 114  | 90   | 45   |
| BI12  | 13  | 49039143  | <i>RBI</i>    | missense      | 0                                 | 0.3867 | 0.3962 | 0.2616 | 0.4737 | 0.3333 | 87                       | 150  | 212  | 172  | 152  | 66   |
| BI12  | 17  | 7578199   | <i>TP53</i>   | missense      | 0                                 | 0.3466 | 0.3272 | 0.3974 | 0.4112 | 0.3009 | 452                      | 929  | 865  | 780  | 766  | 319  |
| BI12  | 17  | 7579355   | <i>TP53</i>   | missense      | 0                                 | 0.403  | 0.3103 | 0.4209 | 0.4333 | 0.2818 | 188                      | 263  | 290  | 297  | 270  | 110  |
| BI14  | 5   | 149449827 | <i>CSF1R</i>  | missense      | 0.4326                            | 0.3538 | 0.4058 | 0.3844 | NA     | NA     | 675                      | 277  | 855  | 588  | NA   | NA   |
| BI14  | 17  | 7578263   | <i>TP53</i>   | stop-gained   | 0.0487                            | 0.012  | 0.4054 | 0.3719 | NA     | NA     | 719                      | 249  | 782  | 691  | NA   | NA   |
| BI15  | 17  | 37866422  | <i>ERBB2</i>  | missense      | 0.506                             | 0.5057 | 0.5036 | 0.4346 | 0.5371 | 0.484  | 747                      | 350  | 417  | 260  | 391  | 281  |

**Supp. Table 3: Protein-altering candidate somatic mutations.** Allele balance of protein-altering candidate somatic mutations across all tumor regions are shown. Tumors were divided into multiple regions (A-E) with a corresponding “control tissue” (X) available from 10 tumors. Candidate mutations were not previously observed in a database derived from >5,000 exomes from the Exome Sequencing Project (ESP) that had been modified to remove positions also found in COSMIC. In several cases (e.g. BI04, BI07, BI08 and BI10) the “control tissue” (X) exhibited a high allele fraction of mutation in known cancer genes (e.g. TP53). We concluded that this was the result of contamination of tumor cells within control tissue and subsequently used a “universal control” for calling copy number alterations (BI12). For several tumors, we did not sequence all five regions plus a control tissue. For these tumors, relevant regions are marked as “NA” or not available.

| <b>Sample Name</b>          | <b>Tumor Type</b> | <b>Grade</b> | <b>p53</b> | <b>RBI</b> | <b>IDH1</b>     |
|-----------------------------|-------------------|--------------|------------|------------|-----------------|
| Clinical Pathology Results* | AO                | III          | NA         | NA         | mutant (IHC)    |
| 09_A                        | AO                | III          | mutant     | wt         | mutant (Sanger) |
| 09_B                        | AO                | III          | mutant     | wt         | mutant (Sanger) |
| 09_C                        | OA                | II           | wt         | wt         | mutant (Sanger) |
| 09_D                        | OA                | II           | wt         | mutant     | mutant (Sanger) |
| 09_E                        | OA                | II           | wt         | mutant     | mutant (Sanger) |

**Supp. Table 4: Histologic grade correlates with TP53 mutation status in BI09.** A pathologist scored sections from each of five regions A-E of BI09 to determine each histopathological type and grade. Results are shown here along with results from DNA sequencing. AO: Anaplastic Oligodendroglioma; OA: Oligoastrocytoma; NA: Not Applicable. wt, wild-type. IDH1 status was measured either by IHC against IDH-R132H mutant (IHC), or by Sanger sequencing (Sanger). \*Diagnosis based on neuropathology report, which is based on the highest degree tumor available at the time

## **Supplementary methods:**

### **Single cell sequencing**

Single nuclei copy number analysis was performed as previously described in Baslan et al. 2012 (PMID: 22555242) with two modifications. Briefly, individual nuclei were either isolated from tumor regions A and E from BI15 by mincing tumor tissue in nuclei lysis buffer or isolated from a HapMap cell line GM12878 (Coriell) directly. Suspended nuclei were passed through a 0.2 um filter and sorted on an FACS Aria cell sorter. Sorted cells were placed into individual tubes, amplified using the PicoPLEX (Rubicon Genomics) single cell amplification kit and prepared for sequencing using the Nextera library preparation kit (Illumina). Libraries were sequenced on the Illumina Miseq using paired-end 100 bp reads. 100,000 reads from each single cell library were mapped to the human hg19 reference. Genomic copy number profiles were created by plotting the number of reads mapping across 1 Mb intervals across the reference genome. While the number of reads made identification of smaller amplifications/deletions difficult, cells with EGFR amplification also appeared to have a deletion of chromosome 10.

### **Whole genome sequencing**

Light whole genome sequencing was performed on DNA isolated from multiple regions of BI15 as well as DNA extracted from the Coriell cell line 12878. Purified DNA was fragmented by sonication with the Covaris S2 instrument. Shotgun sequencing libraries were prepared using the KAPA library preparation kit (Kapa Biosystems) with sample barcoding following manufacturer's instructions. All libraries were sequenced on Miseq instruments (Illumina) using paired-end 100-bp reads. Copy number profiles were generated as described in "Single Cell Sequencing".
